# Supplementary material for: Research on the economic consequences of leukemia at the global, regional and national
Source: Research Square preprint supplement (doi:10.21203/rs.3.rs-6488943/v1), 2025-05-30
Supplement: Supplementary file 1 [file 64ecd044da94a55a540e2c8a.docx]

**Supplementary Materials1.Detailed Explanation of Leukemia Codes in ICD-10 Classification System**

**I. Lymphoid Leukemia (C91)**

C91.0 Acute lymphoid Leukemia (ALL)

C91.1 Chronic lymphoid Leukemia (CLL)

C91.3 Prolymphocytic leukemia (PLL)

C91.4 Hodgkin Lymphoma (HCL)

C91.5 Adult T-cell Leukemia/Lymphoma (HTLV-1 Associated)

C91.6 Precursor T-celllymphoid leukemia

C91.8 Other specific types oflymphoid leukemia

C91.9 Undifferentiatedlymphoid leukemia

**II. Myeloid Leukemia (C92)**

C92.0 Acute Myeloid Leukemia (AML)

Subtypes can be further classified (e.g., C92.00-C92.02, with extended codes in some countries).

C92.1 Chronic myeloid leukemia (CML), with positive BCR-ABL

C92.2 Atypical chronic myeloid leukemia (aCML), BCR-ABL negative

C92.3 Myxoid sarcoma (granulocytic sarcoma)

C92.4 Acute promyelocytic leukemia (APL, AML-M3)

C92.5 Acute Myelomonocytic Leukemia (AMML)

C92.6 Acute erythroleukemia

C92.8 Other specific types of myeloid leukemia

C92.9 Undifferentiated myeloid leukemia

**III. Monocytic Leukemia (C93)**

C93.0 Acute Monocytic Leukemia

C93.1 Chronic Monocytic Leukemia

C93.3 Juvenile myelomonocytic leukemia (JMML)

C93.7 Other specific types of monocytic leukemia

C93.9 Undifferentiated monocytic leukemia

**IV. Other types of leukemia**

C94.0 Acute erythroid leukemia

C94.2 Acute megakaryocytic leukemia

C94.3 Mastocytosis Leukemia

C94.4 Acute myeloid hyperplasia with myelofibrosis

C94.7 Other specific leukemia (such as mixed phenotype acute leukemia, MPAL)

C95.0 Acute leukemia, unspecified cell type

C95.1 Chronic leukemia, unspecified cell type

C95.9 Leukemia, not otherwise specified (NOS)

**Supplementary Materials2.VLW and VLW/GDP in 2021 forLeukemia , generated using income elasticity (IE) at 0.55. All $ values are in 2017 USD, PPP.**

| **Country** | **Super region** | **All** | | **Acute lymphoid leukemia** | | **Chronic lymphoid leukemia** | | **Acute myeloid leukemia** | | **Chronic myeloid leukemia** | | **Other leukemia** | |
| --- | --- | --- | --- | --- | --- | --- | --- | --- | --- | --- | --- | --- | --- |
| **VLW(billion)** | **VLW/GDP(billion)** | **VLW(billion)** | **VLW/GDP(billion)** | **VLW(billion)** | **VLW/GDP(billion)** | **VLW(billion)** | **VLW/GDP(billion)** | **VLW(billion)** | **VLW/GDP(billion)** | **VLW(billion)** | **VLW/GDP(billion)** |
| Republic of Albania | Central Europe, Eastern Europe and Central Asia | 0.000794 | 0.000123 | 0.001017 | 0.000071 | 0.000055 | 0.000004 | 0.000471 | 0.000033 | 0.000143 | 0.000010 | 0.000070 | 0.000005 |
| Armenia | Central Europe, Eastern Europe and Central Asia | 0.000874 | 0.000034 | 0.001511 | 0.000023 | 0.000139 | 0.000002 | 0.000528 | 0.000008 | 0.000044 | 0.000001 | 0.000024 | 0.000000 |
| Azerbaijan | Central Europe, Eastern Europe and Central Asia | 0.000415 | 0.000028 | 0.000149 | 0.000008 | 0.000060 | 0.000003 | 0.000244 | 0.000014 | 0.000021 | 0.000001 | 0.000028 | 0.000002 |
| Bulgaria | Central Europe, Eastern Europe and Central Asia | 0.000133 | 0.000042 | 0.000026 | 0.000008 | 0.000019 | 0.000006 | 0.000078 | 0.000024 | 0.000009 | 0.000003 | 0.000007 | 0.000002 |
| Bosnia and Herzegovina | Central Europe, Eastern Europe and Central Asia | 0.015978 | 0.000042 | 0.002799 | 0.000007 | 0.001439 | 0.000003 | 0.009453 | 0.000023 | 0.000628 | 0.000002 | 0.003019 | 0.000007 |
| Belarus | Central Europe, Eastern Europe and Central Asia | 0.015101 | 0.000046 | 0.007861 | 0.000016 | 0.000725 | 0.000001 | 0.009665 | 0.000020 | 0.001311 | 0.000003 | 0.002675 | 0.000005 |
| Czechia | Central Europe, Eastern Europe and Central Asia | 0.000555 | 0.000050 | 0.000216 | 0.000016 | 0.000074 | 0.000005 | 0.000261 | 0.000019 | 0.000046 | 0.000003 | 0.000100 | 0.000007 |
| Estonia | Central Europe, Eastern Europe and Central Asia | 0.000034 | 0.000047 | 0.000002 | 0.000002 | 0.000000 | 0.000000 | 0.000015 | 0.000020 | 0.000010 | 0.000013 | 0.000008 | 0.000011 |
| Georgia | Central Europe, Eastern Europe and Central Asia | 0.000052 | 0.000038 | 0.000012 | 0.000007 | 0.000002 | 0.000002 | 0.000034 | 0.000022 | 0.000011 | 0.000007 | 0.000002 | 0.000001 |
| Croatia | Central Europe, Eastern Europe and Central Asia | 0.042064 | 0.000030 | 0.007788 | 0.000005 | 0.003819 | 0.000002 | 0.028850 | 0.000019 | 0.002737 | 0.000002 | 0.002840 | 0.000002 |
| Hungary | Central Europe, Eastern Europe and Central Asia | 0.015441 | 0.000033 | 0.002166 | 0.000005 | 0.001991 | 0.000004 | 0.009307 | 0.000019 | 0.001130 | 0.000002 | 0.001022 | 0.000002 |
| Kyrgyzstan | Central Europe, Eastern Europe and Central Asia | 0.002323 | 0.000058 | 0.001042 | 0.000019 | 0.000178 | 0.000003 | 0.001345 | 0.000025 | 0.000209 | 0.000004 | 0.000413 | 0.000008 |
| Lithuania | Central Europe, Eastern Europe and Central Asia | 0.000044 | 0.000035 | 0.000058 | 0.000021 | 0.000006 | 0.000002 | 0.000019 | 0.000007 | 0.000004 | 0.000001 | 0.000009 | 0.000003 |
| Latvia | Central Europe, Eastern Europe and Central Asia | 0.017341 | 0.000032 | 0.003255 | 0.000005 | 0.001471 | 0.000002 | 0.011606 | 0.000019 | 0.000976 | 0.000002 | 0.001816 | 0.000003 |
| Republic of Moldova | Central Europe, Eastern Europe and Central Asia | 0.000152 | 0.000029 | 0.000384 | 0.000022 | 0.000014 | 0.000001 | 0.000095 | 0.000005 | 0.000007 | 0.000000 | 0.000022 | 0.000001 |
| North Macedonia | Central Europe, Eastern Europe and Central Asia | 0.000198 | 0.000047 | 0.000736 | 0.000037 | 0.000018 | 0.000001 | 0.000122 | 0.000006 | 0.000013 | 0.000001 | 0.000028 | 0.000001 |
| Montenegro | Central Europe, Eastern Europe and Central Asia | 0.009189 | 0.000043 | 0.008849 | 0.000021 | 0.000128 | 0.000000 | 0.005012 | 0.000012 | 0.001247 | 0.000003 | 0.002674 | 0.000006 |
| Mongolia | Central Europe, Eastern Europe and Central Asia | 0.004830 | 0.000060 | 0.000671 | 0.000008 | 0.000408 | 0.000005 | 0.003119 | 0.000037 | 0.000240 | 0.000003 | 0.000655 | 0.000008 |
| Poland | Central Europe, Eastern Europe and Central Asia | 0.001361 | 0.000041 | 0.000336 | 0.000008 | 0.000004 | 0.000000 | 0.000743 | 0.000018 | 0.000110 | 0.000003 | 0.000500 | 0.000012 |
| Romania | Central Europe, Eastern Europe and Central Asia | 0.000465 | 0.000045 | 0.000095 | 0.000008 | 0.000050 | 0.000004 | 0.000249 | 0.000022 | 0.000068 | 0.000006 | 0.000049 | 0.000004 |
| Russian Federation | Central Europe, Eastern Europe and Central Asia | 0.000934 | 0.000041 | 0.000222 | 0.000009 | 0.000183 | 0.000008 | 0.000462 | 0.000020 | 0.000048 | 0.000002 | 0.000057 | 0.000002 |
| Serbia | Central Europe, Eastern Europe and Central Asia | 0.004186 | 0.000054 | 0.000453 | 0.000007 | 0.000894 | 0.000013 | 0.001788 | 0.000026 | 0.000293 | 0.000004 | 0.000317 | 0.000005 |
| Slovakia | Central Europe, Eastern Europe and Central Asia | 0.000063 | 0.000039 | 0.000037 | 0.000015 | 0.000007 | 0.000003 | 0.000019 | 0.000008 | 0.000008 | 0.000003 | 0.000023 | 0.000009 |
| Slovenia | Central Europe, Eastern Europe and Central Asia | 0.000257 | 0.000034 | 0.000012 | 0.000002 | 0.000020 | 0.000003 | 0.000157 | 0.000022 | 0.000021 | 0.000003 | 0.000038 | 0.000005 |
| Tajikistan | Central Europe, Eastern Europe and Central Asia | 0.001745 | 0.000095 | 0.002159 | 0.000053 | 0.000084 | 0.000002 | 0.001007 | 0.000025 | 0.000190 | 0.000005 | 0.000380 | 0.000009 |
| Turkmenistan | Central Europe, Eastern Europe and Central Asia | 0.058613 | 0.000047 | 0.023866 | 0.000014 | 0.004149 | 0.000002 | 0.038931 | 0.000023 | 0.005186 | 0.000003 | 0.006198 | 0.000004 |
| Ukraine | Central Europe, Eastern Europe and Central Asia | 0.000301 | 0.000058 | 0.000025 | 0.000005 | 0.000017 | 0.000003 | 0.000174 | 0.000033 | 0.000028 | 0.000005 | 0.000064 | 0.000012 |
| Uzbekistan | Central Europe, Eastern Europe and Central Asia | 0.000613 | 0.000052 | 0.000134 | 0.000010 | 0.000019 | 0.000001 | 0.000409 | 0.000029 | 0.000057 | 0.000004 | 0.000108 | 0.000008 |
| Antigua and Barbuda | Latin America and the Caribbean | 20.147962 | 0.000604 | 0.440102 | 0.000025 | 9.828408 | 0.000552 | 0.264975 | 0.000015 | 0.029873 | 0.000002 | 0.196298 | 0.000011 |
| Bahamas | Latin America and the Caribbean | 0.022493 | 0.000910 | 0.012859 | 0.000347 | 0.001610 | 0.000043 | 0.012026 | 0.000324 | 0.003408 | 0.000092 | 0.003839 | 0.000104 |
| Belize | Latin America and the Caribbean | 0.001343 | 0.000049 | 0.000334 | 0.000011 | 0.000198 | 0.000007 | 0.000866 | 0.000029 | 0.000053 | 0.000002 | 0.000029 | 0.000001 |
| Bermuda | Latin America and the Caribbean | 0.009690 | 0.000034 | 0.001754 | 0.000006 | 0.001499 | 0.000005 | 0.004687 | 0.000016 | 0.000457 | 0.000002 | 0.001548 | 0.000005 |
| Bolivia (Plurinational State of) | Latin America and the Caribbean | 0.132121 | 0.000032 | 0.023054 | 0.000005 | 0.015056 | 0.000003 | 0.084534 | 0.000019 | 0.009493 | 0.000002 | 0.007981 | 0.000002 |
| Brazil | Latin America and the Caribbean | 0.000073 | 0.000035 | 0.000059 | 0.000017 | 0.000014 | 0.000004 | 0.000028 | 0.000008 | 0.000004 | 0.000001 | 0.000013 | 0.000004 |
| Barbados | Latin America and the Caribbean | 0.000025 | 0.000072 | 0.000017 | 0.000031 | 0.000002 | 0.000004 | 0.000013 | 0.000023 | 0.000005 | 0.000009 | 0.000003 | 0.000005 |
| Colombia | Latin America and the Caribbean | 0.000241 | 0.000018 | 0.000150 | 0.000008 | 0.000044 | 0.000002 | 0.000137 | 0.000007 | 0.000008 | 0.000000 | 0.000007 | 0.000000 |
| Costa Rica | Latin America and the Caribbean | 0.000827 | 0.000021 | 0.000951 | 0.000012 | 0.000100 | 0.000001 | 0.000427 | 0.000005 | 0.000024 | 0.000000 | 0.000177 | 0.000002 |
| Caribbean | Latin America and the Caribbean | 0.000046 | 0.000009 | 0.000109 | 0.000006 | 0.000005 | 0.000000 | 0.000028 | 0.000002 | 0.000003 | 0.000000 | 0.000005 | 0.000000 |
| Dominica | Latin America and the Caribbean | 0.000000 | 0.000007 | 0.001477 | 0.000007 | 0.000000 | 0.000000 | 0.000000 | 0.000000 | 0.000000 | 0.000000 | 0.000000 | 0.000000 |
| Dominican Republic | Latin America and the Caribbean | 0.000084 | 0.000030 | 0.000019 | 0.000006 | 0.000007 | 0.000002 | 0.000049 | 0.000015 | 0.000007 | 0.000002 | 0.000015 | 0.000005 |
| Ecuador | Latin America and the Caribbean | 0.000259 | 0.000044 | 0.000018 | 0.000003 | 0.000000 | 0.000000 | 0.000172 | 0.000028 | 0.000084 | 0.000013 | 0.000003 | 0.000000 |
| Grenada | Latin America and the Caribbean | 0.001302 | 0.000020 | 0.001086 | 0.000010 | 0.000159 | 0.000001 | 0.000583 | 0.000005 | 0.000099 | 0.000001 | 0.000303 | 0.000003 |
| Guatemala | Latin America and the Caribbean | 0.001959 | 0.000103 | 0.001884 | 0.000051 | 0.000063 | 0.000002 | 0.001242 | 0.000034 | 0.000326 | 0.000009 | 0.000267 | 0.000007 |
| Guyana | Latin America and the Caribbean | 0.000037 | 0.000049 | 0.000010 | 0.000012 | 0.000005 | 0.000006 | 0.000005 | 0.000005 | 0.000007 | 0.000008 | 0.000016 | 0.000018 |
| Honduras | Latin America and the Caribbean | 0.065216 | 0.000045 | 0.018316 | 0.000010 | 0.001157 | 0.000001 | 0.052988 | 0.000029 | 0.005010 | 0.000003 | 0.004903 | 0.000003 |
| Haiti | Latin America and the Caribbean | 0.002972 | 0.000026 | 0.001102 | 0.000007 | 0.000159 | 0.000001 | 0.001902 | 0.000013 | 0.000112 | 0.000001 | 0.000640 | 0.000004 |
| Jamaica | Latin America and the Caribbean | 0.002812 | 0.000034 | 0.000333 | 0.000004 | 0.000277 | 0.000003 | 0.001965 | 0.000023 | 0.000137 | 0.000002 | 0.000156 | 0.000002 |
| Saint Kitts and Nevis | Latin America and the Caribbean | 0.000094 | 0.000027 | 0.000051 | 0.000010 | 0.000003 | 0.000001 | 0.000071 | 0.000014 | 0.000005 | 0.000001 | 0.000013 | 0.000003 |
| Saint Lucia | Latin America and the Caribbean | 0.000464 | 0.000027 | 0.000104 | 0.000005 | 0.000030 | 0.000002 | 0.000352 | 0.000018 | 0.000031 | 0.000002 | 0.000021 | 0.000001 |
| Mexico | Latin America and the Caribbean | 0.014856 | 0.000059 | 0.007771 | 0.000021 | 0.000396 | 0.000001 | 0.008817 | 0.000024 | 0.000932 | 0.000002 | 0.004315 | 0.000012 |
| Nicaragua | Latin America and the Caribbean | 0.016077 | 0.000063 | 0.009606 | 0.000024 | 0.000854 | 0.000002 | 0.011013 | 0.000028 | 0.002554 | 0.000006 | 0.000803 | 0.000002 |
| Panama | Latin America and the Caribbean | 0.005375 | 0.000010 | 0.001196 | 0.000000 | 0.001196 | 0.000000 | 0.001196 | 0.000000 | 0.000353 | 0.000002 | 0.001435 | 0.000008 |
| Peru | Latin America and the Caribbean | 0.009524 | 0.000007 | 0.002470 | 0.000000 | 0.002470 | 0.000000 | 0.002470 | 0.000000 | 0.000452 | 0.000002 | 0.001661 | 0.000006 |
| Puerto Rico | Latin America and the Caribbean | 0.049376 | 0.000014 | 0.012492 | 0.000000 | 0.012492 | 0.000000 | 0.012492 | 0.000000 | 0.005497 | 0.000006 | 0.006404 | 0.000007 |
| Paraguay | Latin America and the Caribbean | 0.000906 | 0.000002 | 0.000286 | 0.000000 | 0.000286 | 0.000000 | 0.000286 | 0.000000 | 0.000008 | 0.000000 | 0.000039 | 0.000001 |
| El Salvador | Latin America and the Caribbean | 0.001166 | 0.000005 | 0.000288 | 0.000000 | 0.000288 | 0.000000 | 0.000288 | 0.000000 | 0.000192 | 0.000003 | 0.000111 | 0.000002 |
| Suriname | Latin America and the Caribbean | 0.000890 | 0.000006 | 0.000268 | 0.000000 | 0.000268 | 0.000000 | 0.000268 | 0.000000 | 0.000049 | 0.000003 | 0.000039 | 0.000003 |
| Trinidad and Tobago | Latin America and the Caribbean | 0.000004 | 0.000000 | 0.000001 | 0.000000 | 0.000001 | 0.000000 | 0.000001 | 0.000000 | 0.000001 | 0.000000 | 0.000000 | 0.000000 |
| Saint Vincent and the Grenadines | Latin America and the Caribbean | 0.021088 | 0.002199 | 0.006390 | 0.000000 | 0.006390 | 0.000000 | 0.006390 | 0.000000 | 0.001213 | 0.001391 | 0.000704 | 0.000808 |
| United States Virgin Islands | Latin America and the Caribbean | 0.000072 | 0.000003 | 0.000020 | 0.000000 | 0.000020 | 0.000000 | 0.000020 | 0.000000 | 0.000008 | 0.000002 | 0.000006 | 0.000001 |
| Islamic Republic of Afghanistan | North Africa and the Middle East | 0.000063 | 0.000042 | 0.000053 | 0.000019 | 0.000001 | 0.000000 | 0.000035 | 0.000013 | 0.000008 | 0.000003 | 0.000019 | 0.000007 |
| United Arab Emirates | North Africa and the Middle East | 0.051016 | 0.000028 | 0.010428 | 0.000005 | 0.005792 | 0.000003 | 0.032653 | 0.000016 | 0.003595 | 0.000002 | 0.003184 | 0.000002 |
| Bahrain | North Africa and the Middle East | 0.002675 | 0.000067 | 0.001824 | 0.000028 | 0.000172 | 0.000003 | 0.001759 | 0.000027 | 0.000372 | 0.000006 | 0.000199 | 0.000003 |
| Algeria | North Africa and the Middle East | 0.002267 | 0.000063 | 0.003263 | 0.000038 | 0.000071 | 0.000001 | 0.001344 | 0.000016 | 0.000174 | 0.000002 | 0.000608 | 0.000007 |
| Egypt | North Africa and the Middle East | 0.000217 | 0.000048 | 0.000199 | 0.000025 | 0.000027 | 0.000003 | 0.000052 | 0.000006 | 0.000074 | 0.000009 | 0.000036 | 0.000005 |
| Iran (Islamic Republic of) | North Africa and the Middle East | 0.001785 | 0.000076 | 0.001037 | 0.000029 | 0.000162 | 0.000005 | 0.001181 | 0.000034 | 0.000152 | 0.000004 | 0.000128 | 0.000004 |
| Iraq | North Africa and the Middle East | 0.000081 | 0.000047 | 0.000017 | 0.000009 | 0.000010 | 0.000005 | 0.000038 | 0.000020 | 0.000011 | 0.000006 | 0.000013 | 0.000007 |
| Jordan | North Africa and the Middle East | 0.002200 | 0.000049 | 0.000189 | 0.000005 | 0.000520 | 0.000014 | 0.000855 | 0.000022 | 0.000154 | 0.000004 | 0.000150 | 0.000004 |
| Kuwait | North Africa and the Middle East | 0.046196 | 0.000073 | 0.054067 | 0.000041 | 0.004005 | 0.000003 | 0.028894 | 0.000022 | 0.005095 | 0.000004 | 0.004198 | 0.000003 |
| Lebanon | North Africa and the Middle East | 0.000018 | 0.000078 | 0.000003 | 0.000010 | 0.000000 | 0.000000 | 0.000011 | 0.000041 | 0.000006 | 0.000021 | 0.000001 | 0.000005 |
| Libya | North Africa and the Middle East | 0.000115 | 0.000020 | 0.000292 | 0.000015 | 0.000012 | 0.000001 | 0.000073 | 0.000004 | 0.000008 | 0.000000 | 0.000009 | 0.000000 |
| Morocco | North Africa and the Middle East | 0.000034 | 0.000046 | 0.000008 | 0.000009 | 0.000000 | 0.000000 | 0.000014 | 0.000015 | 0.000007 | 0.000007 | 0.000014 | 0.000015 |
| North Africa and Middle East | North Africa and the Middle East | 0.000065 | 0.000012 | 0.000096 | 0.000008 | 0.000008 | 0.000001 | 0.000030 | 0.000002 | 0.000005 | 0.000000 | 0.000013 | 0.000001 |
| Oman | North Africa and the Middle East | 0.001251 | 0.000054 | 0.001000 | 0.000025 | 0.000109 | 0.000003 | 0.000732 | 0.000018 | 0.000191 | 0.000005 | 0.000109 | 0.000003 |
| Palestine | North Africa and the Middle East | 0.012379 | 0.000003 | 0.003668 | 0.000000 | 0.003668 | 0.000000 | 0.003668 | 0.000000 | 0.000969 | 0.000002 | 0.000405 | 0.000001 |
| Qatar | North Africa and the Middle East | 0.000082 | 0.000018 | 0.000018 | 0.000000 | 0.000018 | 0.000000 | 0.000018 | 0.000000 | 0.000021 | 0.000014 | 0.000006 | 0.000004 |
| Saudi Arabia | North Africa and the Middle East | 0.000088 | 0.000008 | 0.000024 | 0.000000 | 0.000024 | 0.000000 | 0.000024 | 0.000000 | 0.000003 | 0.000001 | 0.000013 | 0.000007 |
| Sudan | North Africa and the Middle East | 0.000878 | 0.000007 | 0.000269 | 0.000000 | 0.000269 | 0.000000 | 0.000269 | 0.000000 | 0.000020 | 0.000002 | 0.000049 | 0.000005 |
| Syrian Arab Republic | North Africa and the Middle East | 0.000731 | 0.000007 | 0.000223 | 0.000000 | 0.000223 | 0.000000 | 0.000223 | 0.000000 | 0.000018 | 0.000002 | 0.000044 | 0.000005 |
| Tunisia | North Africa and the Middle East | 0.022907 | 0.026614 | 0.007102 | 0.000000 | 0.007102 | 0.000000 | 0.007102 | 0.000000 | 0.000404 | 0.006718 | 0.001198 | 0.019897 |
| Turkey | North Africa and the Middle East | 0.003635 | 0.000003 | 0.001130 | 0.000000 | 0.001130 | 0.000000 | 0.001130 | 0.000000 | 0.000047 | 0.000001 | 0.000197 | 0.000003 |
| Yemen | North Africa and the Middle East | 0.000143 | 0.000000 | 0.000000 | 0.000000 | 0.000000 |  | 0.000000 |  | 0.000086 |  | 0.000056 |  |
| Andorra | High income | 0.000046 | 0.000054 | 0.000098 | 0.000039 | 0.000008 | 0.000003 | 0.000026 | 0.000010 | 0.000003 | 0.000001 | 0.000002 | 0.000001 |
| Argentina | High income | 0.000000 | 0.000004 | 0.003161 | 0.000004 | 0.000000 | 0.000000 | 0.000000 | 0.000000 | 0.000000 | 0.000000 | 0.000000 | 0.000000 |
| Australia | High income | 0.000394 | 0.000012 | 0.000551 | 0.000008 | 0.000043 | 0.000001 | 0.000222 | 0.000003 | 0.000018 | 0.000000 | 0.000069 | 0.000001 |
| Austria | High income | 0.000511 | 0.000028 | 0.000829 | 0.000018 | 0.000058 | 0.000001 | 0.000287 | 0.000006 | 0.000021 | 0.000000 | 0.000088 | 0.000002 |
| Belgium | High income | 0.000232 | 0.000024 | 0.000163 | 0.000011 | 0.000043 | 0.000003 | 0.000128 | 0.000009 | 0.000010 | 0.000001 | 0.000007 | 0.000000 |
| Brunei Darussalam | High income | 0.012231 | 0.000030 | 0.001833 | 0.000004 | 0.001651 | 0.000004 | 0.007163 | 0.000018 | 0.000839 | 0.000002 | 0.000927 | 0.000002 |
| Canada | High income | 0.022518 | 0.000070 | 0.010915 | 0.000026 | 0.003636 | 0.000009 | 0.012057 | 0.000028 | 0.001728 | 0.000004 | 0.001462 | 0.000003 |
| Switzerland | High income | 0.035050 | 0.000027 | 0.008818 | 0.000006 | 0.003851 | 0.000003 | 0.021751 | 0.000015 | 0.001889 | 0.000001 | 0.003708 | 0.000003 |
| Chile | High income | 0.001638 | 0.000038 | 0.000121 | 0.000003 | 0.000331 | 0.000009 | 0.000762 | 0.000020 | 0.000099 | 0.000003 | 0.000115 | 0.000003 |
| Cyprus | High income | 0.000007 | 0.000013 | 0.000020 | 0.000010 | 0.000001 | 0.000000 | 0.000004 | 0.000002 | 0.000000 | 0.000000 | 0.000001 | 0.000001 |
| Germany | High income | 0.000018 | 0.000028 | 0.000036 | 0.000020 | 0.000002 | 0.000001 | 0.000010 | 0.000005 | 0.000001 | 0.000001 | 0.000004 | 0.000002 |
| Denmark | High income | 0.000050 | 0.000048 | 0.000009 | 0.000008 | 0.000006 | 0.000005 | 0.000018 | 0.000016 | 0.000006 | 0.000005 | 0.000015 | 0.000013 |
| Spain | High income | 0.000813 | 0.000062 | 0.000984 | 0.000035 | 0.000045 | 0.000002 | 0.000492 | 0.000017 | 0.000125 | 0.000004 | 0.000106 | 0.000004 |
| Finland | High income | 0.001134 | 0.000211 | 0.003322 | 0.000159 | 0.000052 | 0.000002 | 0.000556 | 0.000027 | 0.000221 | 0.000011 | 0.000254 | 0.000012 |
| France | High income | 0.068925 | 0.000032 | 0.032926 | 0.000010 | 0.001674 | 0.000001 | 0.034104 | 0.000011 | 0.010689 | 0.000003 | 0.020784 | 0.000007 |
| United Kingdom | High income | 0.009893 | 0.000063 | 0.003979 | 0.000019 | 0.000625 | 0.000003 | 0.004310 | 0.000021 | 0.003775 | 0.000018 | 0.000559 | 0.000003 |
| Greece | High income | 0.104415 | 0.000026 | 0.027941 | 0.000006 | 0.001647 | 0.000000 | 0.067809 | 0.000013 | 0.006638 | 0.000001 | 0.026675 | 0.000005 |
| Greenland | High income | 0.000270 | 0.000002 | 0.000158 | 0.000001 | 0.000021 | 0.000000 | 0.000154 | 0.000001 | 0.000026 | 0.000000 | 0.000048 | 0.000000 |
| Ireland | High income | 0.000031 | 0.000028 | 0.000070 | 0.000020 | 0.000004 | 0.000001 | 0.000017 | 0.000005 | 0.000001 | 0.000000 | 0.000006 | 0.000002 |
| Iceland | High income | 0.002302 | 0.000048 | 0.001957 | 0.000022 | 0.000042 | 0.000000 | 0.001384 | 0.000016 | 0.000259 | 0.000003 | 0.000575 | 0.000006 |
| Israel | High income | 0.000058 | 0.000043 | 0.000058 | 0.000024 | 0.000012 | 0.000005 | 0.000032 | 0.000013 | 0.000001 | 0.000000 | 0.000001 | 0.000001 |
| Italy | High income | 0.003683 | 0.000050 | 0.000373 | 0.000006 | 0.000682 | 0.000010 | 0.001726 | 0.000026 | 0.000294 | 0.000004 | 0.000298 | 0.000004 |
| Japan | High income | 0.001315 | 0.000013 | 0.000587 | 0.000004 | 0.000124 | 0.000001 | 0.000849 | 0.000006 | 0.000107 | 0.000001 | 0.000111 | 0.000001 |
| Republic of Korea | High income | 0.308784 | 0.000087 | 0.093542 | 0.000025 | 0.072558 | 0.000019 | 0.119368 | 0.000031 | 0.023908 | 0.000006 | 0.020391 | 0.000005 |
| Luxembourg | High income | 0.000438 | 0.000041 | 0.000216 | 0.000014 | 0.000020 | 0.000001 | 0.000324 | 0.000021 | 0.000035 | 0.000002 | 0.000039 | 0.000003 |
| Monaco | High income | 0.000410 | 0.000052 | 0.000474 | 0.000029 | 0.000046 | 0.000003 | 0.000196 | 0.000012 | 0.000024 | 0.000002 | 0.000097 | 0.000006 |
| Malta | High income | 0.003187 | 0.000050 | 0.019080 | 0.000043 | 0.000301 | 0.000001 | 0.001996 | 0.000005 | 0.000148 | 0.000000 | 0.000442 | 0.000001 |
| Netherlands | High income | 0.000007 | 0.000033 | 0.000002 | 0.000008 | 0.000001 | 0.000003 | 0.000002 | 0.000007 | 0.000002 | 0.000007 | 0.000002 | 0.000008 |
| Norway | High income | 0.001084 | 0.000056 | 0.000366 | 0.000014 | 0.000000 | 0.000000 | 0.000709 | 0.000027 | 0.000322 | 0.000012 | 0.000052 | 0.000002 |
| New Zealand | High income | 0.007377 | 0.000032 | 0.001543 | 0.000006 | 0.000789 | 0.000003 | 0.004906 | 0.000019 | 0.000479 | 0.000002 | 0.000413 | 0.000002 |
| Portugal | High income | 0.003559 | 0.000007 | 0.001106 | 0.000000 | 0.001106 | 0.000000 | 0.001106 | 0.000000 | 0.000135 | 0.000004 | 0.000106 | 0.000003 |
| Singapore | High income | 0.000010 | 0.000001 | 0.000003 | 0.000000 | 0.000003 | 0.000000 | 0.000003 | 0.000000 | 0.000000 | 0.000000 | 0.000000 | 0.000000 |
| San Marino | High income | 0.009486 | 0.000002 | 0.002717 | 0.000000 | 0.002717 | 0.000000 | 0.002717 | 0.000000 | 0.000780 | 0.000001 | 0.000556 | 0.000001 |
| Sweden | High income | 0.000703 | 0.000002 | 0.000227 | 0.000000 | 0.000227 | 0.000000 | 0.000227 | 0.000000 | 0.000006 | 0.000001 | 0.000014 | 0.000001 |
| Uruguay | High income | 0.140292 | 0.000001 | 0.038931 | 0.000000 | 0.038931 | 0.000000 | 0.038931 | 0.000000 | 0.005603 | 0.000000 | 0.017895 | 0.000001 |
| United States of America | High income | 0.000014 | 0.000000 | 0.000003 | 0.000000 | 0.000003 | 0.000000 | 0.000003 | 0.000000 | 0.000002 | 0.000000 | 0.000004 | 0.000000 |
| American Samoa | East Asia, Southeast Asia and Oceania | 0.007964 | 0.000037 | 0.004150 | 0.000013 | 0.000376 | 0.000001 | 0.005346 | 0.000017 | 0.000826 | 0.000003 | 0.001040 | 0.000003 |
| China | East Asia, Southeast Asia and Oceania | 0.004872 | 0.000083 | 0.005546 | 0.000050 | 0.001145 | 0.000010 | 0.001353 | 0.000012 | 0.000223 | 0.000002 | 0.001007 | 0.000009 |
| Fiji | East Asia, Southeast Asia and Oceania | 0.008195 | 0.000044 | 0.001266 | 0.000007 | 0.001400 | 0.000008 | 0.004147 | 0.000023 | 0.000603 | 0.000003 | 0.000646 | 0.000004 |
| Micronesia (Federated States of) | East Asia, Southeast Asia and Oceania | 0.010646 | 0.000022 | 0.002278 | 0.000004 | 0.001251 | 0.000002 | 0.006912 | 0.000013 | 0.000618 | 0.000001 | 0.000614 | 0.000001 |
| Guam | East Asia, Southeast Asia and Oceania | 0.000011 | 0.000047 | 0.000003 | 0.000011 | 0.000000 | 0.000000 | 0.000007 | 0.000023 | 0.000003 | 0.000011 | 0.000001 | 0.000002 |
| Cambodia | East Asia, Southeast Asia and Oceania | 0.000576 | 0.000051 | 0.000180 | 0.000013 | 0.000060 | 0.000004 | 0.000358 | 0.000026 | 0.000032 | 0.000002 | 0.000067 | 0.000005 |
| Kiribati | East Asia, Southeast Asia and Oceania | 0.000217 | 0.000040 | 0.000391 | 0.000027 | 0.000033 | 0.000002 | 0.000092 | 0.000006 | 0.000015 | 0.000001 | 0.000044 | 0.000003 |
| Sri Lanka | East Asia, Southeast Asia and Oceania | 0.003238 | 0.000092 | 0.002965 | 0.000045 | 0.000090 | 0.000001 | 0.002194 | 0.000033 | 0.000414 | 0.000006 | 0.000452 | 0.000007 |
| Maldives | East Asia, Southeast Asia and Oceania | 0.000459 | 0.000048 | 0.000105 | 0.000009 | 0.000010 | 0.000001 | 0.000160 | 0.000014 | 0.000060 | 0.000005 | 0.000219 | 0.000019 |
| Marshall Islands | East Asia, Southeast Asia and Oceania | 0.000167 | 0.000021 | 0.000118 | 0.000009 | 0.000026 | 0.000002 | 0.000110 | 0.000009 | 0.000002 | 0.000000 | 0.000003 | 0.000000 |
| Myanmar | East Asia, Southeast Asia and Oceania | 0.000324 | 0.000049 | 0.000393 | 0.000028 | 0.000025 | 0.000002 | 0.000182 | 0.000013 | 0.000052 | 0.000004 | 0.000038 | 0.000003 |
| Northern Mariana Islands | East Asia, Southeast Asia and Oceania | 0.023765 | 0.000024 | 0.003676 | 0.000003 | 0.002138 | 0.000002 | 0.016773 | 0.000016 | 0.001303 | 0.000001 | 0.001413 | 0.000001 |
| Mauritius | East Asia, Southeast Asia and Oceania | 0.000010 | 0.000063 | 0.000001 | 0.000008 | 0.000000 | 0.000000 | 0.000006 | 0.000033 | 0.000003 | 0.000017 | 0.000001 | 0.000004 |
| Malaysia | East Asia, Southeast Asia and Oceania | 0.002236 | 0.000025 | 0.000148 | 0.000002 | 0.000190 | 0.000002 | 0.001429 | 0.000016 | 0.000086 | 0.000001 | 0.000341 | 0.000004 |
| Nauru | East Asia, Southeast Asia and Oceania | 0.004493 | 0.000046 | 0.000774 | 0.000007 | 0.000326 | 0.000003 | 0.003051 | 0.000029 | 0.000375 | 0.000004 | 0.000415 | 0.000004 |
| Philippines | East Asia, Southeast Asia and Oceania | 0.063047 | 0.000008 | 0.015885 | 0.000000 | 0.015885 | 0.000000 | 0.015885 | 0.000000 | 0.005604 | 0.000003 | 0.009789 | 0.000005 |
| Palau | East Asia, Southeast Asia and Oceania | 0.000583 | 0.000004 | 0.000178 | 0.000000 | 0.000178 | 0.000000 | 0.000178 | 0.000000 | 0.000014 | 0.000001 | 0.000034 | 0.000003 |
| Papua New Guinea | East Asia, Southeast Asia and Oceania | 0.180954 | 0.000010 | 0.046827 | 0.000000 | 0.046827 | 0.000000 | 0.046827 | 0.000000 | 0.013707 | 0.000003 | 0.026765 | 0.000007 |
| Solomon Islands | East Asia, Southeast Asia and Oceania | 0.000209 | 0.000016 | 0.000053 | 0.000000 | 0.000053 | 0.000000 | 0.000053 | 0.000000 | 0.000017 | 0.000006 | 0.000032 | 0.000010 |
| Seychelles | East Asia, Southeast Asia and Oceania | 0.024011 | 0.000011 | 0.006156 | 0.000000 | 0.006156 | 0.000000 | 0.006156 | 0.000000 | 0.003155 | 0.000006 | 0.002387 | 0.000005 |
| Thailand | East Asia, Southeast Asia and Oceania | 0.000009 | 0.000007 | 0.000002 | 0.000000 | 0.000002 | 0.000000 | 0.000002 | 0.000000 | 0.000002 | 0.000005 | 0.000002 | 0.000003 |
| Timor-Leste | East Asia, Southeast Asia and Oceania | 0.001191 | 0.000012 | 0.000300 | 0.000000 | 0.000300 | 0.000000 | 0.000300 | 0.000000 | 0.000163 | 0.000007 | 0.000129 | 0.000005 |
| Tonga | East Asia, Southeast Asia and Oceania | 0.001391 | 0.000004 | 0.000408 | 0.000000 | 0.000408 | 0.000000 | 0.000408 | 0.000000 | 0.000089 | 0.000002 | 0.000078 | 0.000002 |
| Tuvalu | East Asia, Southeast Asia and Oceania | 0.003647 | 0.000012 | 0.001048 | 0.000000 | 0.001048 | 0.000000 | 0.001048 | 0.000000 | 0.000224 | 0.000006 | 0.000278 | 0.000007 |
| Viet Nam | East Asia, Southeast Asia and Oceania | 0.020197 | 0.000005 | 0.006066 | 0.000000 | 0.006066 | 0.000000 | 0.006066 | 0.000000 | 0.000376 | 0.000001 | 0.001622 | 0.000004 |
| Vanuatu | East Asia, Southeast Asia and Oceania | 0.000031 | 0.000015 | 0.000006 | 0.000000 | 0.000006 | 0.000000 | 0.000006 | 0.000000 | 0.000012 | 0.000012 | 0.000003 | 0.000003 |
| Samoa | East Asia, Southeast Asia and Oceania | 0.000031 | 0.000018 | 0.000005 |  | 0.000005 | 0.000000 | 0.000005 | 0.000000 | 0.000012 | 0.000015 | 0.000003 | 0.000003 |
| Bangladesh | South Asia | 0.000056 | 0.000043 | 0.000041 | 0.000020 | 0.000008 | 0.000004 | 0.000024 | 0.000012 | 0.000001 | 0.000001 | 0.000014 | 0.000007 |
| Bhutan | South Asia | 0.002845 | 0.000043 | 0.001384 | 0.000015 | 0.000163 | 0.000002 | 0.001709 | 0.000018 | 0.000198 | 0.000002 | 0.000612 | 0.000006 |
| India | South Asia | 0.000710 | 0.000038 | 0.000238 | 0.000010 | 0.000068 | 0.000003 | 0.000466 | 0.000020 | 0.000052 | 0.000002 | 0.000055 | 0.000002 |
| Nepal | South Asia | 0.025536 | 0.000036 | 0.004196 | 0.000006 | 0.004988 | 0.000007 | 0.011944 | 0.000017 | 0.001353 | 0.000002 | 0.002263 | 0.000003 |
| Pakistan | South Asia | 0.000368 | 0.000000 | 0.000000 |  | 0.000000 |  | 0.000000 |  | 0.000035 |  | 0.000334 |  |
| South Asia | South Asia | 0.003655 | 0.000016 | 0.001060 | 0.000000 | 0.001060 | 0.000000 | 0.001060 | 0.000000 | 0.000083 | 0.000003 | 0.000392 | 0.000013 |
| Angola | Sub-Saharan Africa | 0.000378 | 0.000032 | 0.000283 | 0.000015 | 0.000066 | 0.000004 | 0.000234 | 0.000012 | 0.000004 | 0.000000 | 0.000007 | 0.000000 |
| Burundi | Sub-Saharan Africa | 0.000659 | 0.000021 | 0.000652 | 0.000012 | 0.000130 | 0.000002 | 0.000348 | 0.000006 | 0.000029 | 0.000001 | 0.000022 | 0.000000 |
| Benin | Sub-Saharan Africa | 0.009911 | 0.000057 | 0.008809 | 0.000028 | 0.000652 | 0.000002 | 0.006156 | 0.000019 | 0.001204 | 0.000004 | 0.001248 | 0.000004 |
| Burkina Faso | Sub-Saharan Africa | 0.000024 | 0.000035 | 0.000025 | 0.000019 | 0.000004 | 0.000003 | 0.000010 | 0.000008 | 0.000001 | 0.000001 | 0.000004 | 0.000003 |
| Botswana | Sub-Saharan Africa | 0.003880 | 0.000027 | 0.001257 | 0.000007 | 0.000081 | 0.000000 | 0.001948 | 0.000010 | 0.000276 | 0.000001 | 0.001493 | 0.000008 |
| Central African Republic | Sub-Saharan Africa | 0.003761 | 0.000076 | 0.004598 | 0.000043 | 0.000230 | 0.000002 | 0.002321 | 0.000022 | 0.000390 | 0.000004 | 0.000589 | 0.000005 |
| Cote d'Ivoire | Sub-Saharan Africa | 0.006599 | 0.000025 | 0.001570 | 0.000005 | 0.000897 | 0.000003 | 0.003950 | 0.000013 | 0.000362 | 0.000001 | 0.000494 | 0.000002 |
| Cameroon | Sub-Saharan Africa | 0.000293 | 0.000074 | 0.000026 | 0.000006 | 0.000001 | 0.000000 | 0.000270 | 0.000063 | 0.000019 | 0.000005 | 0.000001 | 0.000000 |
| Democratic Republic of the Congo | Sub-Saharan Africa | 0.079531 | 0.000029 | 0.016440 | 0.000006 | 0.009267 | 0.000003 | 0.047380 | 0.000016 | 0.005615 | 0.000002 | 0.008003 | 0.000003 |
| Congo | Sub-Saharan Africa | 0.000019 | 0.000055 | 0.000002 | 0.000006 | 0.000000 | 0.000000 | 0.000012 | 0.000030 | 0.000006 | 0.000015 | 0.000002 | 0.000004 |
| Comoros | Sub-Saharan Africa | 0.079012 | 0.000028 | 0.017060 | 0.000005 | 0.007395 | 0.000002 | 0.055423 | 0.000018 | 0.004686 | 0.000001 | 0.004112 | 0.000001 |
| Cabo Verde | Sub-Saharan Africa | 0.000969 | 0.000054 | 0.000166 | 0.000009 | 0.000124 | 0.000007 | 0.000529 | 0.000028 | 0.000061 | 0.000003 | 0.000130 | 0.000007 |
| Djibouti | Sub-Saharan Africa | 0.000129 | 0.000020 | 0.000132 | 0.000011 | 0.000019 | 0.000002 | 0.000083 | 0.000007 | 0.000005 | 0.000000 | 0.000003 | 0.000000 |
| Ethiopia | Sub-Saharan Africa | 0.002867 | 0.000039 | 0.000360 | 0.000005 | 0.000518 | 0.000008 | 0.001483 | 0.000021 | 0.000155 | 0.000002 | 0.000193 | 0.000003 |
| Gabon | Sub-Saharan Africa | 0.018886 | 0.000065 | 0.008665 | 0.000023 | 0.002588 | 0.000007 | 0.009911 | 0.000026 | 0.002064 | 0.000005 | 0.001735 | 0.000005 |
| Ghana | Sub-Saharan Africa | 0.000527 | 0.000025 | 0.000149 | 0.000006 | 0.000043 | 0.000002 | 0.000381 | 0.000015 | 0.000025 | 0.000001 | 0.000036 | 0.000001 |
| Guinea | Sub-Saharan Africa | 0.012408 | 0.000028 | 0.002707 | 0.000006 | 0.001494 | 0.000003 | 0.008325 | 0.000017 | 0.000618 | 0.000001 | 0.000477 | 0.000001 |
| Gambia | Sub-Saharan Africa | 0.064670 | 0.000033 | 0.015129 | 0.000007 | 0.007369 | 0.000003 | 0.041728 | 0.000019 | 0.003805 | 0.000002 | 0.004398 | 0.000002 |
| Guinea-Bissau | Sub-Saharan Africa | 0.000485 | 0.000041 | 0.000129 | 0.000009 | 0.000020 | 0.000001 | 0.000205 | 0.000014 | 0.000039 | 0.000003 | 0.000202 | 0.000014 |
| Equatorial Guinea | Sub-Saharan Africa | 0.002508 | 0.000061 | 0.000394 | 0.000009 | 0.000093 | 0.000002 | 0.002083 | 0.000045 | 0.000081 | 0.000002 | 0.000159 | 0.000003 |
| Kenya | Sub-Saharan Africa | 0.000620 | 0.000078 | 0.000124 | 0.000014 | 0.000072 | 0.000008 | 0.000398 | 0.000046 | 0.000039 | 0.000004 | 0.000039 | 0.000005 |
| Liberia | Sub-Saharan Africa | 0.000622 | 0.000046 | 0.000149 | 0.000011 | 0.000132 | 0.000009 | 0.000358 | 0.000026 | 0.000000 | 0.000000 | 0.000000 | 0.000000 |
| Lesotho | Sub-Saharan Africa | 0.000211 | 0.000036 | 0.000042 | 0.000007 | 0.000040 | 0.000007 | 0.000110 | 0.000019 | 0.000009 | 0.000002 | 0.000012 | 0.000002 |
| Madagascar | Sub-Saharan Africa | 0.000062 | 0.000017 | 0.000099 | 0.000011 | 0.000009 | 0.000001 | 0.000034 | 0.000004 | 0.000002 | 0.000000 | 0.000009 | 0.000001 |
| Mali | Sub-Saharan Africa | 0.000988 | 0.000136 | 0.001140 | 0.000076 | 0.000096 | 0.000006 | 0.000613 | 0.000041 | 0.000045 | 0.000003 | 0.000138 | 0.000009 |
| Mozambique | Sub-Saharan Africa | 0.009436 | 0.000021 | 0.002176 | 0.000004 | 0.000884 | 0.000002 | 0.006611 | 0.000013 | 0.000387 | 0.000001 | 0.000671 | 0.000001 |
| Mauritania | Sub-Saharan Africa | 0.000872 | 0.000045 | 0.000784 | 0.000021 | 0.000010 | 0.000000 | 0.000457 | 0.000012 | 0.000136 | 0.000004 | 0.000260 | 0.000007 |
| Malawi | Sub-Saharan Africa | 0.007194 | 0.000030 | 0.001379 | 0.000005 | 0.000902 | 0.000004 | 0.004345 | 0.000017 | 0.000396 | 0.000002 | 0.000648 | 0.000003 |
| Namibia | Sub-Saharan Africa | 0.010523 | 0.000053 | 0.007926 | 0.000023 | 0.000089 | 0.000000 | 0.005914 | 0.000017 | 0.001526 | 0.000004 | 0.002906 | 0.000008 |
| Niger | Sub-Saharan Africa | 0.002301 | 0.000061 | 0.001918 | 0.000028 | 0.000092 | 0.000001 | 0.001616 | 0.000024 | 0.000238 | 0.000004 | 0.000263 | 0.000004 |
| Nigeria | Sub-Saharan Africa | 0.008237 | 0.000063 | 0.006614 | 0.000029 | 0.000520 | 0.000002 | 0.004457 | 0.000020 | 0.000778 | 0.000003 | 0.001962 | 0.000009 |
| Rwanda | Sub-Saharan Africa | 0.000359 | 0.000002 | 0.000115 | 0.000000 | 0.000115 | 0.000000 | 0.000115 | 0.000000 | 0.000004 | 0.000001 | 0.000010 | 0.000001 |
| Senegal | Sub-Saharan Africa | 0.002016 | 0.000007 | 0.000516 | 0.000000 | 0.000516 | 0.000000 | 0.000516 | 0.000000 | 0.000147 | 0.000002 | 0.000321 | 0.000005 |
| Sierra Leone | Sub-Saharan Africa | 0.002791 | 0.000005 | 0.000719 | 0.000000 | 0.000719 | 0.000000 | 0.000719 | 0.000000 | 0.000137 | 0.000001 | 0.000499 | 0.000004 |
| Somalia | Sub-Saharan Africa | 0.000246 | 0.000001 | 0.000081 | 0.000000 | 0.000081 | 0.000000 | 0.000081 | 0.000000 | 0.000002 | 0.000000 | 0.000002 | 0.000001 |
| Sao Tome and Principe | Sub-Saharan Africa | 0.000092 | 0.000023 | 0.000019 | 0.000000 | 0.000019 | 0.000000 | 0.000019 | 0.000000 | 0.000009 | 0.000006 | 0.000025 | 0.000017 |
| Eswatini | Sub-Saharan Africa | 0.000344 | 0.000002 | 0.000109 | 0.000000 | 0.000109 | 0.000000 | 0.000109 | 0.000000 | 0.000003 | 0.000000 | 0.000013 | 0.000002 |
| Chad | Sub-Saharan Africa | 0.002024 | 0.000007 | 0.000554 | 0.000000 | 0.000554 | 0.000000 | 0.000554 | 0.000000 | 0.000105 | 0.000002 | 0.000255 | 0.000005 |
| Togo | Sub-Saharan Africa | 0.000462 | 0.000010 | 0.000142 | 0.000000 | 0.000142 | 0.000000 | 0.000142 | 0.000000 | 0.000018 | 0.000005 | 0.000018 | 0.000005 |
| United Republic of Tanzania | Sub-Saharan Africa | 0.000742 | 0.000001 | 0.000194 | 0.000000 | 0.000194 | 0.000000 | 0.000194 | 0.000000 | 0.000072 | 0.000000 | 0.000087 | 0.000000 |
| Uganda | Sub-Saharan Africa | 0.151793 | 0.000425 | 0.041993 | 0.000000 | 0.041993 | 0.000000 | 0.041993 | 0.000000 | 0.013983 | 0.000230 | 0.011832 | 0.000195 |
| South Africa | Sub-Saharan Africa | 0.015407 | 0.000001 | 0.004993 | 0.000000 | 0.004993 | 0.000000 | 0.004993 | 0.000000 | 0.000130 | 0.000000 | 0.000297 | 0.000001 |
| Zambia | Sub-Saharan Africa | 0.001077 | 0.000004 | 0.000328 | 0.000000 | 0.000328 | 0.000000 | 0.000328 | 0.000000 | 0.000021 | 0.000001 | 0.000071 | 0.000003 |
| Zimbabwe | Sub-Saharan Africa | 1.667200 | 0.002762 | 0.000610 | 0.002693 | 0.000610 | 0.000000 | 0.000610 | 0.000000 | 0.000010 | 0.000000 | 0.000018 | 0.000001 |
